# 1 **Microbial biogeography of 1,000 geothermal springs** 2 **in New Zealand**

3  
4 J.F. Power<sup>1,2</sup>, C.R. Carere<sup>1</sup>, C.K. Lee<sup>2</sup>, G.L.J. Wakerley<sup>2</sup>, D.W. Evans<sup>1</sup>, M. Button<sup>3</sup>,  
5 D. White<sup>4</sup>, M.D. Climo<sup>4</sup>, A.M. Hinze<sup>3</sup>, X.C. Morgan<sup>5</sup>, I.R. McDonald<sup>2</sup>, S.C. Cary<sup>2\*</sup> and  
6 M.B. Stott<sup>1,6\*</sup>

7  
8 <sup>1</sup>Geomicrobiology Research Group, Department of Geothermal Sciences, GNS  
9 Science, Taupō, New Zealand

10 <sup>2</sup>Thermophile Research Unit, School of Science, University of Waikato, Hamilton,  
11 New Zealand

12 <sup>3</sup>Department of Computer Science, University of Waikato, Hamilton, New Zealand

13 <sup>4</sup>Wairakei Research Centre, GNS Science, Taupō, New Zealand

14 <sup>5</sup>Department of Microbiology and Immunology, University of Otago, Dunedin, New  
15 Zealand

16 <sup>6</sup>School of Biological Sciences, University of Canterbury, Christchurch, New Zealand

17  
18 **\*Corresponding authors:** Dr. Matthew Stott ([matthew.stott@canterbury.ac.nz](mailto:matthew.stott@canterbury.ac.nz); +64  
19 (0)3 369 2511) and Prof. Craig Cary ([caryc@waikato.ac.nz](mailto:caryc@waikato.ac.nz); +64 (0)7 838 4593)

20  
21 **Keywords:** Geothermal, hot springs, microbial ecology, biogeography, extremophiles

22  
23 **Geothermal springs are model ecosystems to systematically investigate**  
24 **microbial biogeography as they i) represent discrete, homogenous habitats; ii)**  
25 **are abundantly distributed across multiple geographical scales; iii) span broad**  
26 **geochemical gradients; and iv) have simple community structures with**  
27 **reduced metazoan interactions. Taking advantage of these traits, we**  
28 **undertook the largest known consolidated study of geothermal ecosystems**  
29 **(<http://1000springs.org.nz>) to determine factors that influence biogeographical**  
30 **patterns. Rigorously standardised methodologies were used to measure**  
31 **microbial communities, 46 physicochemical parameters, and metadata from**  
32 **1,019 hot spring samples across New Zealand. pH was found to be the primary**  
33 **influence on diversity in springs < 70 °C with community similarity decreasing**  
34 **with geographic distance. Surprisingly, community composition was**  
35 **dominated by two genera (*Venenivibrio* and *Acidithiobacillus*) in both average**

36 **relative abundance (11.2 and 11.1 %) and prevalence (74.2 and 62.9 %**  
37 **respectively) across physicochemical spectrums of 13.9 – 100.6 °C and pH < 1**  
38 **– 9.7. This study provides an unprecedented insight into the ecological**  
39 **conditions that drive community assembly in geothermal springs, and can be**  
40 **used as a foundation to improve the characterisation of global microbial**  
41 **biogeographical processes.**

42

43 Microbial biogeography identifies patterns of diversity across defined spatial or  
44 temporal scales in an attempt to describe the factors which influence these  
45 distributions. The pervasive view that microorganisms are dispersed ubiquitously and  
46 therefore do not adhere to classical biogeographical patterns has been historically  
47 presumed<sup>1</sup>. Recent studies, however, have contradicted this paradigm and shown  
48 that microbial community diversity is shaped across time and space<sup>2,3</sup> via a  
49 combination of environmental selection, stochastic drift, diversification and dispersal  
50 limitation<sup>4,5</sup>. The relative impact of these ecological drivers on diversity is the subject  
51 of ongoing debate, with differential findings reported across terrestrial, marine and  
52 human ecosystems<sup>6–12</sup>.

53

54 Geothermally-heated springs are ideal systems to investigate microbial  
55 biogeography. In comparison to terrestrial environments, geothermal springs  
56 represent discrete, homogenous aquatic habitats with broad physicochemical  
57 gradients distributed across proximal and distal geographic distances. The relatively  
58 simple microbial community structures, typical of geothermal springs, also allow for  
59 the robust identification of diversity trends. Separate studies have each alternatively  
60 implicated temperature<sup>8,13,14</sup>, pH<sup>15</sup>, and seasonality<sup>16</sup> as the primary drivers of  
61 community diversity in these ecosystems; with niche specialisation observed within  
62 both local and regional populations<sup>17,18</sup>. The neutral action of microbial dispersal is  
63 also thought to be a significant driver behind the distribution of microorganisms<sup>23</sup>,  
64 with endemism and allopatric speciation reported in intercontinental hotspots<sup>21,22</sup>. It  
65 is important to note that significant community differences have been found between  
66 aqueous and soil/sediment samples from the same springs<sup>13,15,23</sup>, emphasising that  
67 the increased relative homogeneity of aqueous samples make geothermal water  
68 columns excellent candidate environments for investigating large scale taxa-  
69 geochemical associations. However, despite these findings, a lack of scale (e.g.

70 geographic distance, sampling quantity/density and physicochemical gradients) and  
71 uniformity in sampling methodology has hindered a holistic view of microbial  
72 biogeography from developing.

73

74 The Taupō Volcanic Zone (TVZ) is a region rich in geothermal hotsprings and broad  
75 physicochemical gradients spanning 8,000 km<sup>2</sup> in New Zealand's North Island (Fig.  
76 1), making it a tractable model system for studying microbial biogeography. This  
77 unique area is a rifting arc associated with subduction at the Pacific-Australian  
78 tectonic plate boundary, resulting in a locus of intense magmatism<sup>24</sup>. The variable  
79 combination of thick, permeable volcanic deposits, high heat flux, and an active  
80 extensional (crustal thinning) setting favours the deep convection of groundwater  
81 and exsolved magmatic volatiles that are expressed as physicochemically-  
82 heterogeneous surface features in 23 geographically distinct geothermal fields<sup>25,26</sup>.  
83 Previous microbiological studies across the region have hinted at novel diversity and  
84 function present within some of these features<sup>27-31</sup>, however investigations into the  
85 biogeographical drivers within the TVZ are sparse and have focused predominantly  
86 on soil/sediments or individual hotsprings<sup>8,14,32</sup>.

87

88 Here we report the diversity and biogeography of microbial communities found in  
89 over 1,000 geothermal spring samples, collected as part of the 1,000 Springs  
90 Project. This project aimed to catalogue the microbial biodiversity and  
91 physicochemistry of New Zealand's iconic hotsprings to serve as a conservation,  
92 scientific, and indigenous cultural knowledge repository for these ecosystems. A  
93 publicly accessible database of all springs surveyed is available online  
94 (<https://1000Springs.org.nz>). Over a period of 93 weeks, rigorously standardised  
95 methodologies were used to collect samples/metadata, perform community analysis  
96 and quantify physicochemistry within the TVZ to answer the following three  
97 questions:

- 98 1. To what extent does physicochemistry and geography influence microbial  
99 diversity and community structure within geothermal springs?
- 100 2. How does the influence of significant physicochemical parameters change in  
101 response to the gradation of other major community drivers?
- 102 3. Can taxon-specific geochemical niches be identified for abundant  
103 microorganisms in these ecosystems?

104 This work represents the largest known microbial ecology study on geothermal  
105 aquatic habitats at a regional scale. Our results clearly demonstrate both the relative  
106 influence of physicochemical parameters (e.g. pH) and the effect of geographic  
107 isolation on the assemblage of communities in these extreme ecosystems.  
108 Collectively these findings expand our knowledge of the constraints that govern  
109 universal microbial biogeographical processes.

110

## 111 **Results & discussion**

112

113 Recent biogeography research has demonstrated microbial diversity patterns are  
114 detectable and are influenced by both deterministic<sup>33</sup> and stochastic processes<sup>6</sup>. A  
115 lack of consensus on the relative impact of these factors, however, has been  
116 exacerbated by an absence of broad physicochemical gradients, and sampling scale  
117 and density across both geographic distance and habitat type. The inherent  
118 heterogeneity of terrestrial soil microbial ecosystems<sup>34,35</sup> further confounds attempts  
119 to distinguish true taxa-geochemical associations. To provide greater resolution to  
120 the factors driving microbial biogeography processes, we determined the  
121 physicochemical and microbial community composition of 1,019 geothermal water-  
122 column samples from across the TVZ (Fig. 1). Samples included representatives of  
123 both extreme pH (< 0 – 9.7) and temperature (13.9 – 100.6 °C) (Supplementary Fig.  
124 1). The filtering of low-quality and temporal samples yielded a final data set of 925  
125 individual geothermal springs for spatial-statistical analysis (more details can be  
126 found in the Supplementary Methodology). From these 925 springs, a total of 28,381  
127 operational taxonomic units (OTUs) were generated for diversity studies.

128

### 129 **Microbial diversity is principally driven by pH, not temperature, in geothermal 130 spring ecosystems**

131 Reduced microbial diversity in geothermal springs is often attributed to the extreme  
132 environmental conditions common to these areas. Temperature and pH are reported  
133 to be the predominant drivers of microbial diversity<sup>8,36</sup>, but their influence relative to  
134 other parameters has not been investigated over large geographic and  
135 physicochemical scales with appropriate sample density. Our analysis of microbial  
136 richness and diversity showed significant variation spanning pH, temperature and



137 geographical gradients within the TVZ (richness: 49 – 2997 OTUs, diversity: 1.1 –  
138 7.3 Shannon index; Supplementary Fig. 2 & 3). As anticipated, average OTU  
139 richness (386 OTUs; Supplementary Fig. 4) was substantially reduced in comparison  
140 to studies of non-geothermal temperate terrestrial<sup>37,38</sup> and aquatic<sup>39</sup> environments.  
141 Further, OTU richness was maximal at the geothermally-moderate temperature of  
142 21.5 °C and at circumneutral pH 6.4. This is consistent with the hypothesis that  
143 polyextreme habitats prohibit the growth of most microbial taxa, a trend reported in  
144 both geothermal and non-geothermal environments alike<sup>8,12</sup>. A comparison of linear  
145 regressions of 46 individual physicochemical parameters (Supplementary Table 1)  
146 confirmed pH as the most significant factor influencing diversity (16.4 %,  $n = 925$ ,  
147  $P < 0.001$ ; Supplementary Fig. 3), while further multiple regression analysis showed  
148  $NO_3^-$ , turbidity, oxidation-reduction potential (ORP), dissolved oxygen,  $NO_2^-$ ,  $Si$  and  
149  $Cd$  also had meaningful contributions (Supplementary Table 2). Cumulatively, along  
150 with pH, these factors accounted for 26.6 % of the observed variation in Shannon  
151 diversity. Correlation of pH with Shannon index (Pearson's coefficient:  $|r| = 0.41$ ,  
152  $P < 0.001$ ) and significance testing between samples binned by pH increments  
153 (Kruskal-Wallis:  $H = 179.4$ ,  $P < 0.001$ ) further confirmed pH as a major driver of  
154 variation in alpha diversity. This finding is consistent with reports of pH as the  
155 primary environmental predictor of microbial diversity in several ecosystems (e.g.  
156 soil<sup>12</sup>, freshwater<sup>40</sup>, alpine<sup>38</sup>).

157

158 It has been previously hypothesised that pH has significant influence on microbial  
159 community composition because changes in proton gradients will drastically alter  
160 nutrient availability, metal solubility, or organic carbon characteristics<sup>12</sup>. Similarly,  
161 acidic pH will also reduce the number of taxa observed due to the low number that  
162 can physiologically tolerate these conditions. Here, we demonstrate that pH had the  
163 most significant effect on diversity across all springs measured, but due to our high  
164 sampling frequency, we see this influence reduced above 70 °C (Fig. 2). Inversely,  
165 the effect of temperature on diversity was diminished in springs where pH was  $< 4$   
166 (Supplementary Fig. 5). There is some evidence that suggests thermophily predates  
167 acid tolerance<sup>41,42</sup>, thus it is possible the added stress of an extreme proton gradient  
168 across cell membranes has constrained the diversification of the thermophilic  
169 chemolithoautotrophic organisms common to these areas<sup>43</sup>. Indeed, a recent

170 investigation of thermoacidophily in archaea suggests hyperacidophily (growth < pH  
171 3.0) may have only arisen as little as  $\sim 0.8 Ga^{42}$ , thereby limiting the opportunity for  
172 microbial diversification; an observation highlighted by the paucity of these  
173 microorganisms in extremely acidic geothermal ecosystems<sup>14,42</sup>. It is also important  
174 to note that salinity has previously been suggested as an important driver of  
175 microbial community diversity<sup>44,45</sup>. The quantitative data in this study showed only  
176 minimal influence of salinity (proxy as conductivity) on diversity (Supplementary  
177 Table 1), bearing in mind that the majority of the hot spring samples in this study had  
178 salinities substantially less than that of seawater.

179

180 The relationship between temperature and diversity reported in this research starkly  
181 contrasts a previous intercontinental study comparing microbial community diversity  
182 in soil/sediments from 165 geothermal springs<sup>8</sup>, which showed a strong relationship  
183 ( $R^2 = 0.40-0.44$ ) existed. In contrast, our data across the entire suite of samples,  
184 revealed temperature had no significant influence on observed community diversity  
185 ( $R^2 = 0.002$ ,  $P = 0.201$ ; Supplementary Fig. 3, Supplementary Table 1). This result  
186 increased marginally for archaeal-only diversity ( $R^2 = 0.013$ ,  $P = 0.0005$ ),  
187 suggesting temperature has a more profound effect on this domain than bacteria.  
188 However, the primers used in this study are known to be unfavourable towards some  
189 archaeal clades<sup>46</sup>, therefore it is likely extensive archaeal diversity remains  
190 undetected in this study. The lack of influence of temperature on whole community  
191 diversity was further substantiated via multiple linear modelling (Supplementary  
192 Table 2), and significance and correlation testing (Kruskal-Wallis:  $H = 16.2$ ,  $P =$   
193  $0.039$ ; Pearson's coefficient:  $|r| = 0.04$ ,  $P = 0.201$ ). When samples were split into  
194 pH increments, like Sharp *et al.* (2014)<sup>8</sup>, we observed increasing temperature only  
195 significantly constrained diversity above moderately acidic conditions (pH > 4;  
196 Supplementary Fig. 5). However, the magnitude of this effect was, in general, far  
197 less than previously reported and is likely a consequence of the sample type (e.g.  
198 soil/sediments versus aqueous) and density processed<sup>15</sup>. Many geothermal  
199 environments are recalcitrant to traditional DNA extraction protocols and research in  
200 these areas has therefore focused on samples with higher biomass abundance<sup>8,36</sup>  
201 (i.e. soils, sediments, streamers or biomats). Whereas aqueous samples typically  
202 exhibit a more homogenous chemistry and community structure, the heterogeneity of

203 terrestrial samples is known to affect microbial populations (e.g. particle size, depth,  
204 nutrient composition)<sup>34,35,47</sup>. Our deliberate use of aqueous samples extends the  
205 results of previous small-scale work<sup>13,32</sup> and also permits the robust identification of  
206 genuine taxa-geochemical relationships in these environments.

207

### 208 **Community structures are influenced by pH, temperature and geothermal** 209 **source fluid**

210 Throughout the TVZ, beta diversity correlated more strongly with pH (Mantel:  $\rho =$   
211  $0.54$ ,  $P < 0.001$ ) than with temperature (Mantel:  $\rho = 0.19$ ,  $P < 0.001$ ; Fig. 2,  
212 Supplementary Table 3). This trend was consistent in pH- and temperature-binned  
213 samples (Supplementary Fig. 7; ANOSIM:  $|R| = 0.46$  and  $0.18$  respectively,  $P <$   
214  $0.001$ ); further confirming pH, more so than temperature, accounted for observed  
215 variations in beta diversity. Congruent with our finding that pH influences alpha  
216 diversity at lower temperatures ( $< 70$  °C), the effect of temperature reducing beta  
217 diversity had greater significance above  $80$  °C ( $P < 0.001$ ; Supplementary Fig. 7).  
218 The extent of measured physicochemical properties across 925 individual habitats,  
219 however, allowed us to explore the environmental impact on community structures  
220 beyond just pH and temperature. Permutational multivariate analysis of variance in  
221 spring community assemblages showed that pH (12.4 %) and temperature (3.9 %)  
222 had the greatest contribution towards beta diversity, followed by ORP (1.4 %),  $SO_4^{2-}$   
223 (0.8 %), turbidity (0.8 %) and  $As$  (0.7 %) ( $P < 0.001$ ; Supplementary Table 4).  
224 Interestingly, constrained correspondence analysis of the 15 most significant, non-  
225 collinear and variable parameters (Supplementary Table 4 & 5; pH, temperature,  
226 turbidity, ORP,  $SO_4^{2-}$ ,  $NO_3^-$ ,  $As$ ,  $NH_4^+$ ,  $HCO_3^-$ ,  $H_2S$ , conductivity,  $Li$ ,  $Al$ ,  $Si$  and  $PO_4^{3-}$ ),  
227 along with geothermal field locations, only explained 10 % of variation in beta  
228 diversity (Fig. 3), indicating physicochemistry, or at least the 46 parameters  
229 measured were not the sole drivers of community composition.

230

231 We also investigated whether typical geochemical conditions exist for springs within  
232 the same geothermal field and whether specific microbial community assemblages  
233 could be predicted. Geothermal fields are known to express chemical signatures  
234 characteristic of their respective source fluids<sup>48</sup>, implying autocorrelation could occur  
235 between location and geochemistry. Springs are usually classified according to these

236 fluids; alkaline-chloride or acid-sulfate. High-chloride features are typically sourced  
237 from magmatic waters and have little interaction with groundwater aquifers. At depth,  
238 water-rock interactions can result in elevated bicarbonate concentrations and,  
239 consequently, neutral to alkaline pH in surface features. Acid-sulfate springs (pH 2-  
240 3), in contrast, form as steam-heated groundwater couples with the eventual  
241 oxidation of hydrogen sulfide into sulfate (and protons). Rarely, a combination of the  
242 two processes can occur; leading to intermediate pH values<sup>49</sup>. It is unknown,  
243 however, whether these source fluid characteristics are predictive of their associated  
244 microbial ecosystems. Bray-Curtis dissimilarities confirmed that, like alpha diversity  
245 (Kruskal-Wallis:  $H = 240.7$ ,  $P < 0.001$ ; Fig. 5), community structures were  
246 significantly different between geothermal fields (ANOSIM:  $|R| = 0.26$ ,  $P < 0.001$ ;  
247 Supplementary Fig. 6). Gradient analysis comparing significant geochemical  
248 variables and geography further identified meaningful intra-geothermal field  
249 clustering of microbial communities (95 % CI; Fig. 3 & Supplementary Fig. 9).  
250 Further, characteristic geochemical signatures from these fields were identified and  
251 analysis suggests they could be predictive of community composition. For example,  
252 the Rotokawa and Waikite geothermal fields (approx. 35 km apart) (Fig. 3N & 3F)  
253 display opposing ratios of  $HCO_3^-$ ,  $SO_4^{2-}$  and  $Cl^-$ , with corresponding microbial  
254 communities for these sites clustering independently in ordination space. Despite  
255 this association, intra-field variation in both alpha and beta diversity also occurred at  
256 other geothermal sites where geochemical signatures were not uniform across local  
257 springs (e.g. Rotorua, Fig. 3D), demonstrating that correlation does not necessarily  
258 always occur between locational proximity and physicochemistry.

259

### 260 **Aquificae and Proteobacteria taxa are abundant and widespread**

261 In order to determine whether individual microbial taxa favoured particular  
262 environmental conditions and locations, we first assessed the distribution of genera  
263 across all individual springs. Within 17 geothermal fields and 925 geothermal  
264 features, 21 phyla were detected with an average relative abundance  $> 0.1$  % (Fig.  
265 4). Surprisingly, we found that two phyla and associated genera, Proteobacteria  
266 (*Acidithiobacillus* spp.) and Aquificae (*Venenivibrio*, *Hydrogenobaculum*, *Aquifex*  
267 spp.), dominated these ecosystems (65.2 % total average relative abundance across  
268 all springs), composing nine of the 15 most abundant genera  $> 1$  % average relative

269 abundance (Table 1). Considering the broad spectrum of geothermal environmental  
270 conditions sampled in this study (we assessed microbial communities in springs  
271 across a pH gradient of nine orders of magnitude and a temperature range of ~  
272 87 °C), this result was surprising and we believe unprecedented in the literature.  
273 Proteobacteria was the most abundant phylum across all samples (34.2 % of total  
274 average relative abundance; Table 1), found predominantly at temperatures less  
275 than 50 °C (Supplementary Fig. 8). Of the 19 most abundant proteobacterial genera  
276 (average relative abundance > 0.1 %), the majority are characterised as aerobic  
277 chemolithoautotrophs, utilising either sulfur species and/or hydrogen for metabolism.  
278 Accordingly, the most abundant (11.1 %) and prevalent (62.9 %) proteobacterial  
279 genus identified was *Acidithiobacillus*, a moderately thermophilic, acidophilic  
280 autotroph that utilises reduced sulfur compounds, iron or hydrogen as energy for  
281 growth.

282

283 Aquificae (order Aquificales) was the second most abundant phylum overall (31 %  
284 average relative abundance across 925 springs) and included three of the four most  
285 abundant genera; *Venenivibrio*, *Hydrogenobaculum* and *Aquifex* (11.2 %, 10.0 %  
286 and 8.6 % respectively; Table 1). As the Aquificae are thermophilic ( $T_{opt}$  65 – 85  
287 °C)<sup>50</sup>, they were much more abundant in warmer springs (> 50 °C ; Supplementary  
288 Fig. 8). The minimal growth temperature reported for characterised Aquificales  
289 species (*Sulfurihydrogenibium subterraneum* and *S. kristjanssonii*)<sup>50</sup> is 40 °C and  
290 may explain the low Aquificae abundance found in springs less than 50 °C.

291 Terrestrial Aquificae are predominately microaerophilic chemolithoautotrophs that  
292 oxidise hydrogen or reduced sulfur compounds; heterotrophy is also observed in a  
293 few representatives<sup>50</sup>. Of the 14 currently described genera within the Aquificae, six  
294 genera were relatively abundant in our dataset (average relative abundance > 0.1  
295 %; Fig. 4): *Aquifex*, *Hydrogenobacter*, *Hydrogenobaculum* and *Thermocrinis* (family  
296 Aquificaceae); and *Sulfurihydrogenibium* and *Venenivibrio* (family  
297 Hydrogenothermaceae). No signatures of the Desulfurobacteriaceae were detected.  
298 This is consistent with reports that all current representatives from this family are  
299 associated with deep-sea or coastal thermal vents<sup>50</sup>. *Venenivibrio* (OTUs;  $n = 111$ )  
300 was also the most prevalent and abundant genus across all communities (Table 1).  
301 This taxon, found in 74.2 % ( $n = 686$ ) of individual springs sampled, has only one

302 cultured representative, *V. stagnispumantis* (CP.B2<sup>T</sup>), which was isolated from the  
303 Waiotapu geothermal field in the TVZ<sup>31</sup>. The broad distribution of this genus across  
304 such a large number of habitats was surprising, as growth of the type strain is only  
305 supported by a narrow set of conditions (pH 4.8 – 5.8, 45 – 75 °C). Considering this  
306 and the number of *Venenivibrio* OTUs detected, we interpret this result as evidence  
307 there is substantial undiscovered phylogenetic and physiological diversity within the  
308 genus. The ubiquity of *Venenivibrio* suggests that either the metabolic capabilities of  
309 this genus extend substantially beyond those described for the type strain, and/or  
310 that many of the divergent taxa could be persisting and not growing under conditions  
311 detected in this study<sup>51,52</sup>.

312

### 313 **Fine-scale geochemical and geographical associations exist at the genus level**

314 The two most abundant phyla, Proteobacteria and Aquificae, were found to occupy a  
315 characteristic ecological niche (< 50 °C and > 50 °C respectively, Supplementary  
316 Fig. 8). To investigate specific taxa-geochemical associations beyond just  
317 temperature and pH, we applied a linear model to determine enrichment of taxa in  
318 association with geothermal fields and other environmental data (Fig. 4). The  
319 strongest associations between taxa and chemistry ( $Z$ -score > 4) were between  
320 *Nitrospira*-nitrate ( $NO_3^-$ ) and *Nitratiruptor*-phosphate ( $PO_4^{3-}$ ). *Nitrospira* oxidises  
321 nitrite to nitrate and therefore differential high abundance of this taxon in nitrate-rich  
322 environments is expected. Further, the positive *Nitratiruptor*- $PO_4^{3-}$  relationship  
323 suggests phosphate is a preferred nutritional requirement for this  
324 chemolithoautotroph<sup>53</sup> and informs future efforts to isolate members of this genus  
325 would benefit from additional phosphate or the presence of reduced P compounds in  
326 the culture medium<sup>54,55</sup>. *Thermus* and *Hydrogenobaculum* were the only bacterial  
327 taxa to differentially associate (compared to other taxa) positively and negatively with  
328 pH respectively. This is consistent with the lack of acidophily phenotype (pH < 4)  
329 reported in *Thermus* spp.<sup>56</sup> and the preferred acidic ecological niche of  
330 *Hydrogenobaculum*<sup>57</sup>. *Aquifex* was the only genus to display above average  
331 association with temperature, confirming abundance of this genera is significantly  
332 enhanced by hyperthermophily<sup>58</sup>.

333



334 Similar to the chemical-taxa associations discussed above, differential abundance  
335 relationships were calculated with respect to individual geothermal fields (Fig. 4).  
336 The Rotorua geothermal field, which contains springs across the pH scale, was  
337 closely associated with the highly abundant and prevalent *Acidithiobacillus* and  
338 *Venenivibrio*. On the other hand, Te Kopia, a predominantly acidic geothermal  
339 system, produced the only positive associations with “*Methylacidiphilum*”  
340 (*Verrucomicrobia*), *Acidimicrobium* (Actinobacteria), *Terrimonas* (Bacteroidetes) and  
341 *Halothiobacillus* (Proteobacteria). Curiously, the strongest positive taxa-geography  
342 associations were identified between both *Fusibacter*-Waiotapu and  
343 *Proteiniclasticum*-Waiotapu. Given the Waiotapu geothermal field is predominately  
344 an acid-sulfate system, the association of Waiotapu to these anaerobic, mesophilic  
345 neutrophiles was unexpected, although a species of *Fusibacter* has been isolated  
346 from a mesophilic spring<sup>59,60</sup>. These relationships are likely describing sub-  
347 community requirements that are otherwise not captured by conventional spatial-  
348 statistical analysis, therefore providing insight into previously unrecognised microbe-  
349 niche interactions.

350

### 351 **Microbial distance-decay patterns differ at local and regional scales**

352 Environmental selection, ecological drift, diversification and dispersal limitation all  
353 contribute to distance-decay patterns<sup>4,61</sup>. While several recent studies have shown  
354 microbial dispersal limitations and distance-decay patterns exist in diverse  
355 environments<sup>9,21,61,62</sup>, the point of inflection between dispersal limitation and  
356 selection, at regional and local geographic scales, remains under-studied. We  
357 identified a positive distance-decay trend with increasing geographic distance  
358 between 925 geothermal spring communities across the TVZ region ( $m = 0.031$ ,  
359  $P < 0.001$ ; Fig. 5). This finding strongly suggests dispersal limitation exists between  
360 individual geothermal fields. Increasing the resolution to within individual fields,  
361 distance-decay patterns are negligible compared to the regional scale  
362 (Supplementary Table 6). Interestingly, the greatest pairwise difference ( $y = 1$ )  
363 between Bray-Curtis dissimilarities was also observed in springs classified as  
364 geographically-adjacent ( $< 1.4$  m). In the 293 springs pairs separated by  $< 1.4$  m,  
365 temperature had a greater correlation with beta diversity than pH (Spearman’s  
366 coefficient:  $\rho = 0.44$  and  $0.30$  respectively,  $P < 0.001$ ). This result illustrates the

367 stark spatial heterogeneity and selective processes that can exist within individual  
368 geothermal fields. Congruently, each OTU was detected in an average of only 13  
369 springs (Supplementary Fig. 4). We propose that physical dispersal within  
370 geothermal fields is therefore not limiting, but the physicochemical diversity of  
371 hotsprings acts as a barrier to the colonisation of immigrating taxa. However, even  
372 between some neighbouring springs with similar (95% *CI*) geochemical signatures,  
373 we did note some dissimilar communities were observed (for example, Waimangu  
374 geothermal field; Fig. 3E). These differing observations can be explained either one  
375 of two ways; firstly, the defining parameter driving community structure was not one  
376 of the 46 physicochemical variables measured in this study (e.g. dissolved organic  
377 carbon); or secondly, through the process of dispersal, the differential viability of  
378 some extremophilic taxa restricts gene flow and contributes to population genetic  
379 drift within geothermal fields<sup>63,64</sup>. We often consider “extremophilic” microorganisms  
380 living in these geothermal environments as the epitome of hardy and robust. In doing  
381 so, we overlook that their proximal surroundings (i.e. immediately outside the host  
382 spring) may not be conducive to growth and survival<sup>65</sup> and therefore the divergence  
383 of populations in neighbouring, chemically-homogenous spring ecosystems is  
384 plausible. Future work could include understanding individual population response<sup>66</sup>  
385 to these community-wide selective pressures.

386

## 387 **Conclusion**

388 This study presents data on both niche and neutral drivers of microbial biogeography  
389 in 1,000 geothermal springs at a near-national scale. Our comprehensive data set,  
390 with sufficient sampling density and standardised methodology, is the first of its kind  
391 to enable a robust spatio-chemical statistical analysis of microbial communities at the  
392 regional level across broad physicochemical gradients. Unequivocally, pH drives  
393 diversity and community complexity structures within geothermal springs. This effect,  
394 however, was only significant at temperatures < 70 °C. We also identified specific  
395 taxa associations and finally demonstrated that geochemical signatures can be  
396 indicative of community composition. Although a distance-decay pattern across the  
397 entire geographic region indicated dispersal limitation, the finding that 293 adjacent  
398 community pairs exhibited up to 100 % dissimilarity suggests niche selection drives  
399 microbial community composition at a localised scale (e.g. within geothermal fields).

400

401 This research provides a comprehensive dataset that should be used as a  
402 foundation for future studies (e.g. diversification<sup>66</sup> and drift<sup>67,68</sup> elucidation on  
403 targeted spring taxa). It complements the recently published Earth Microbiome  
404 Project<sup>45</sup> by expanding our knowledge of the biogeographical constraints on aquatic  
405 ecosystems using standardised quantification of broad physicochemical spectrums.  
406 There is also potential to use the two studies to compare geothermal ecosystems on  
407 a global scale. Finally, our research provides a springboard to assess the cultural,  
408 recreational and resource development value of the microbial component of  
409 geothermal springs, both in New Zealand and globally. Many of the features included  
410 in this study occur on culturally-important and protected land for Māori, therefore this  
411 or follow-on future projects may provide an avenue for exploration of indigenous  
412 knowledge, while assisting in conservation efforts and/or development.

413

## 414 **Methods**

415

### 416 **Field sampling & processing**

417 Between July 2013 and April 2015, 1,019 aqueous samples were collected from 974  
418 distinct geothermal features within 18 geothermal fields in the TVZ. A three litre  
419 integrated water column sample was taken from each geothermal spring, lake,  
420 stream, or the catchment pool of geysers for microbial and chemical analyses.  
421 Comprehensive physical and chemical measurements, and field observational  
422 metadata were recorded contemporaneously with a custom-built application and  
423 automatically uploaded to a database. All samples were filtered within two hours of  
424 collection and stored accordingly (Supplementary Table 7). Total DNA was extracted  
425 using a modified CTAB method<sup>69</sup> with the PowerMag Microbial DNA Isolation Kit  
426 using SwiftMag technology (MoBio Laboratories, Carlsbad, CA, USA). The V4 region  
427 of the 16S rRNA gene was amplified in triplicate using universal Earth Microbiome  
428 Project<sup>70</sup> primers F515 (5'-GTGCCAGCMGCCGCGGTAA-3') and R806 (5'-  
429 GGACTACVSGGGTATCTAAT-3'). SPRIselect (Beckman Coulter, Brea, CA, USA)  
430 was used to purify DNA following amplification. Amplicon sequencing was performed  
431 using the Ion PGM System for Next-Generation Sequencing with the Ion 318v2 Chip  
432 and Ion PGM Sequencing 400 Kits (ThermoFisher Scientific, Waltham, MA, USA).

433

434 Forty-seven separate physicochemical parameters were determined for each  
435 hotspring sample collected. Inductively coupled plasma-optical emission  
436 spectrometry (ICP-OES) and –mass spectrometry (ICP-MS) were used to determine  
437 the concentrations of aqueous metals and non-metals (31 species), and various UV-  
438 Vis spectrometry methods were used to determine aqueous nitrogen species ( $NH_4^+$ ,  
439  $NO_3^-$ ,  $NO_2^-$ ,  $PO_4^{3-}$ ), with  $Fe^{2+}$ ,  $H_2$ ,  $HCO_3^-$  and  $Cl^-$  determined via titration, and sulfate  
440 concentration measured via ion chromatography (IC). Conductivity (COND),  
441 dissolved oxygen (dO), oxidation-reduction potential (ORP), pH, temperature  
442 (TEMP), and turbidity (TURB) were determined using a Hanna Instruments  
443 (Woonsocket, RI, USA) multiparameter field meter *in situ*. Expanded details on  
444 sampling procedures, sample processing, DNA extraction, DNA amplification, and  
445 chemical analyses can be found in the Supplementary Methodology and  
446 Supplementary Table 7.

447

#### 448 **DNA sequence processing**

449 DNA sequences were processed through a custom pipeline utilising components of  
450 UPARSE<sup>71</sup> and QIIME<sup>72</sup>. An initial screening step was performed in mothur<sup>73</sup> to  
451 remove abnormally short (< 275 bp) and long (> 345 bp) sequences. Sequences  
452 with long homopolymers (> 6) were also removed. A total of 47,103,077 reads were  
453 quality filtered using USEARCH v7<sup>71</sup> with a maximum expected error of 1 %  
454 (fastq\_maxee = 2.5) and truncated from the forward primer to 250 bp. Retained  
455 sequences (85.4 % of initial reads) were dereplicated and non-unique sequences  
456 removed. Next, reads were clustered to 97 % similarity and chimera checked using  
457 the cluster\_otus command in USEARCH, and a *de novo* database was created of  
458 representative operational taxonomic units (OTUs). 93.2 % of the original pre-filtered  
459 sequences (truncated to 250 bp) mapped to these OTUs, and taxonomy was  
460 assigned using the Ribosomal Database Project Classifier<sup>74</sup> (with a minimum  
461 confidence score of 0.5) against the SILVA 16S rRNA database (123 release, July  
462 2015)<sup>75</sup>. The final read count was 43,202,089, with a mean of 43,905 reads per  
463 sample. Chloroplasts and mitochondrial reads were removed (1.0 and 0.5 %  
464 respectively of the final read count) and rarefaction was performed to 9,500 reads  
465 per sample.

466

## 467 **Statistical analyses**

468 All statistical analyses and visualisation were performed in the R environment<sup>76</sup> using  
469 phyloseq<sup>77</sup>, vegan<sup>78</sup> and ggplot2<sup>79</sup> packages. Alpha diversity was calculated using  
470 the estimate\_richness function in phyloseq. A series of filtering criteria were applied  
471 to the 46 geochemical parameters measured in this study to identify metadata that  
472 significantly correlated with alpha diversity in these spring communities. First,  
473 collinear variables (Pearson correlation coefficient  $|r| > 0.7$ ) were detected<sup>80</sup>. The  
474 best-fit linear regression between alpha diversity (using Shannon's index) and each  
475 variable was used to pick a representative from each collinear group. This removed  
476 variables associating with the same effect in diversity. Multiple linear regression was  
477 then applied to remaining variables, before and after a stepwise Akaike information  
478 criterion (AIC) model selection was run<sup>81</sup>. Due to the wide pH, temperature and  
479 geographic ranges for this dataset, samples were also binned by increments of each  
480 criterion respectively (Supplementary Fig. 1), with non-parametric Kruskal-Wallis ( $H$ )  
481 testing performed to identify any significant differences between groups. Finally,  
482 correlation of pH and temperature against Shannon diversity was calculated using  
483 Pearson's coefficient  $|r|$ .

484  
485 Bray-Curtis dissimilarity was used for all beta diversity comparisons. For ordination  
486 visualisations, a square-root transformation was applied to OTU relative abundances  
487 prior to non-metric multidimensional scaling ( $k = 2$ ) using the metaMDS function in  
488 the vegan package. ANOSIM ( $|R|$ ) was used to compare beta diversity across the  
489 same pH, temperature and geographic groups (i.e. geothermal fields) used for alpha  
490 diversity analyses, followed by pairwise Wilcox testing with Bonferroni correction to  
491 highlight significance between individual groups. Linear regression was applied to  
492 pairwise geographic distances against spring community dissimilarities to assess the  
493 significance of distance-decay patterns. These comparisons were similarly  
494 performed on spring communities constrained to each geothermal field. A second  
495 series of filtering criteria was applied to geochemical parameters to identify metadata  
496 that significantly correlated with beta diversity. Mantel tests were performed between  
497 beta diversity and all 46 physicochemical variables using Spearman's correlation  
498 coefficient ( $\rho$ ) with 9,999 permutations. In decreasing order of correlation, metadata  
499 were added to a PERMANOVA analysis using the adonis function in vegan.

500 Metadata significantly correlating with beta diversity ( $P < 0.01$ ) was assessed for  
501 collinearity using Pearson's coefficient  $|r|^{80}$ . In each collinear group ( $|r| > 0.7$ ), the  
502 variable with the highest mantel statistic was chosen as the representative. Low  
503 variant geochemical variables ( $\sigma < 0.25$  ppm) were then removed to allow a tractable  
504 number of explanatory variables for subsequent modelling. Constrained  
505 correspondence analysis (using the `cca` function in `vegan`) was then applied to  
506 OTUs, geothermal field locations and the reduced set of metadata. OTUs were first  
507 agglomerated to their respective genera (using the `tax_glom` function in `phyloseq`)  
508 and then low abundant taxa ( $< 0.7$  %) of total mean taxon abundance were  
509 removed. Typical geochemical signatures within each geothermal field were used to  
510 produce ternary diagrams of  $Cl^-$ ,  $SO_4^{2-}$  and  $HCO_3^-$  ratios using the `ggtern` package<sup>82</sup>.

511

512 Finally, to detect significant associations between taxa, geochemistry and other  
513 metadata (i.e. geothermal field observations), a linear model was applied to  
514 determine log enrichment of taxa using `edgeR`<sup>83</sup>. To simplify the display of taxonomy  
515 in this model, we first agglomerated all OTUs to their respective genera or closest  
516 assigned taxonomy group (using the `tax_glom` function in `phyloseq`), and then only  
517 used taxa present in at least 5 % of samples and  $> 0.1$  % average relative  
518 abundance. Log fold enrichments of taxa were transformed into  $Z$ -scores and  
519 retained if absolute values were  $> 1.96$ . Results were visualized using `ggtree`<sup>84</sup>. A  
520 phylogenetic tree was generated in QIIME by confirming alignment of representative  
521 OTU sequences using `PyNAST`<sup>85</sup>, filtering the alignment to remove positions which  
522 were gaps in every sequence and then building an approximately maximum-  
523 likelihood tree using `FastTree`<sup>86</sup> with a midpoint root.

524

### 525 **Data availability**

526 Raw sequences have been deposited into the European Nucleotide Archive (ENA)  
527 under study accession number PRJEB24353. General data is presented in a user-  
528 friendly queryable website (<http://1000springs.org.nz>). All code used for statistics and  
529 figures is available through GitLab ([https://gitlab.com/morganlab/collaboration-  
530 1000Springs/1000Springs](https://gitlab.com/morganlab/collaboration-1000Springs/1000Springs)).

531

532



## 533 **Acknowledgements**

534 The authors wish to acknowledge all our landowners and Māori collaborators for  
535 access and support of this research. *Mana whenua* (customary rights) is  
536 acknowledged for all data generated arising from geothermal features within *rohe* of  
537 iwi. The primary collection and processing of samples was funded by an MBIE Smart  
538 Idea grant (C05X1203 - Microbial Bioinventory of Geothermal Ecosystems) awarded  
539 to MBS and SCC, colloquially known as the 1,000 Springs Project  
540 (<http://1000springs.org.nz>). JFP was also supported by a GNS Science Postgraduate  
541 Scholarship (under the Geothermal Resources of New Zealand Research  
542 Programme), and the University of Waikato Hilary Jolly Memorial Scholarship. We  
543 thank Karen Houghton and Hanna-Annette Peach for assistance with field work,  
544 Kevin Lee for advice on bioinformatics, and Jayadev Payyakkal Viswam for help with  
545 DNA extractions. We also thank Isabelle Chambeft, Ed Mroczek and Nellie Olsen  
546 for valuable comments.

547

## 548 **Author contributions**

549 MBS, SCC, JFP, IRM and MDC designed the study. JFP, DWE, MBS, CRC and  
550 GLJW undertook field work and processing of samples. MB, DW, MBS, JFP and  
551 AMH designed the field application, database and website. GLJW performed DNA  
552 extractions and sequencing. JFP and CKL processed DNA sequences. JFP and  
553 XCM performed data analysis and statistics. JFP, CRC and MBS wrote the  
554 manuscript, with assistance from SCC, XCM, CKL, IRM and GLJW.

555

556

## 557 **References**

558

- 559 1. O'Malley, M. A. The nineteenth century roots of 'everything is everywhere'. *Nat. Rev.*  
560 *Microbiol.* **5**, 647–652 (2007).
- 561 2. Zhang, S.-Y. *et al.* Land scale biogeography of arsenic biotransformation genes in estuarine  
562 wetland. *Environ. Microbiol.* **19**, 2468–2482 (2017).
- 563 3. Ward, C. S. *et al.* Annual community patterns are driven by seasonal switching between  
564 closely related marine bacteria. *ISME J.* **11**, 1412–1422 (2017).
- 565 4. Hanson, C. A., Fuhrman, J. A., Horner-Devine, M. C. & Martiny, J. B. H. Beyond biogeographic  
566 patterns: processes shaping the microbial landscape. *Nat. Rev. Microbiol.* **10**, 497–506 (2012).
- 567 5. Nemergut, D. R. *et al.* Patterns and processes of microbial community assembly. *Microbiol.*

- 568 *Mol. Biol. Rev.* **77**, 342–56 (2013).
- 569 6. Hernando-Morales, V., Ameneiro, J. & Teira, E. Water mass mixing shapes bacterial  
570 biogeography in a highly hydrodynamic region of the Southern Ocean. *Environ. Microbiol.* **19**,  
571 1017–1029 (2017).
- 572 7. O'Brien, S. L. *et al.* Spatial scale drives patterns in soil bacterial diversity. *Environ. Microbiol.*  
573 **18**, 2039–2051 (2016).
- 574 8. Sharp, C. E. *et al.* Humboldt's spa: microbial diversity is controlled by temperature in  
575 geothermal environments. *ISME J.* **8**, 1166–74 (2014).
- 576 9. Lear, G. *et al.* Following Rapoport's Rule: The geographic range and genome size of bacterial  
577 taxa decline at warmer latitudes. *Environ. Microbiol.* **19**, 3152–3162 (2017).
- 578 10. Louca, S. *et al.* Functional structure of the bromeliad tank microbiome is strongly shaped by  
579 local geochemical conditions. *Environ. Microbiol.* **19**, 3132–3151 (2017).
- 580 11. Costello, E. K. *et al.* Bacterial community variation in human body habitats across space and  
581 time. *Science* **326**, 1694–7 (2009).
- 582 12. Lauber, C. L., Hamady, M., Knight, R. & Fierer, N. Pyrosequencing-based assessment of soil  
583 pH as a predictor of soil bacterial community structure at the continental scale. *Appl. Environ.*  
584 *Microbiol.* **75**, 5111–20 (2009).
- 585 13. Cole, J. K. *et al.* Sediment microbial communities in Great Boiling Spring are controlled by  
586 temperature and distinct from water communities. *ISME J.* **7**, 718–29 (2013).
- 587 14. Ward, L. *et al.* Microbial community dynamics in Inferno Crater Lake, a thermally fluctuating  
588 geothermal spring. *ISME J.* **11**, 1158–1167 (2017).
- 589 15. Colman, D. R. *et al.* Ecological differentiation in planktonic and sediment-associated  
590 chemotrophic microbial populations in Yellowstone hot springs. *FEMS Microbiol. Ecol.* **92**,  
591 fiw137 (2016).
- 592 16. Briggs, B. R. *et al.* Seasonal patterns in microbial communities inhabiting the hot springs of  
593 Tengchong, Yunnan Province, China. *Environ. Microbiol.* **16**, 1579–91 (2014).
- 594 17. Beam, J. P., Jay, Z. J., Kozubal, M. A. & Inskeep, W. P. Niche specialization of novel  
595 Thaumarchaeota to oxic and hypoxic acidic geothermal springs of Yellowstone National Park.  
596 *ISME J.* **8**, 938–51 (2014).
- 597 18. Miller-Coleman, R. L. *et al.* Korarchaeota diversity, biogeography, and abundance in  
598 Yellowstone and Great Basin hot springs and ecological niche modeling based on machine  
599 learning. *PLoS One* **7**, e35964 (2012).
- 600 19. Monteil, C. L., Bardin, M. & Morris, C. E. Features of air masses associated with the deposition  
601 of *Pseudomonas syringae* and *Botrytis cinerea* by rain and snowfall. *ISME J.* **8**, 2290–304  
602 (2014).
- 603 20. Herbold, C. W., Lee, C. K., McDonald, I. R. & Cary, S. C. Evidence of global-scale aeolian  
604 dispersal and endemism in isolated geothermal microbial communities of Antarctica. *Nat.*  
605 *Commun.* **5**, 3875 (2014).
- 606 21. Whitaker, R. J., Grogan, D. W. & Taylor, J. W. Geographic barriers isolate endemic  
607 populations of hyperthermophilic archaea. *Science* **301**, 976–978 (2003).

- 608 22. Papke, R. T., Ramsing, N. B., Bateson, M. M. & Ward, D. M. Geographical isolation in hot  
609 spring cyanobacteria. *Environ. Microbiol.* **5**, 650–659 (2003).
- 610 23. Hou, W. *et al.* A comprehensive census of microbial diversity in hot springs of Tengchong,  
611 Yunnan Province China using 16S rRNA gene pyrosequencing. *PLoS One* **8**, e53350 (2013).
- 612 24. Wilson, C. J. N. *et al.* Volcanic and structural evolution of Taupo Volcanic Zone, New-Zealand:  
613 a review. *J. Volcanol. Geotherm. Res.* **68**, 1–28 (1995).
- 614 25. Chambefort, I. & Bignall, G. Taupo Volcanic Zone Geothermal Systems, New Zealand:  
615 Exploration, Science and Development. *Geothermics* **59**, 147–356 (2016).
- 616 26. Reyes, A. G., Christenson, B. W. & Faure, K. Sources of solutes and heat in low-enthalpy  
617 mineral waters and their relation to tectonic setting, New Zealand. *J. Volcanol. Geotherm. Res.*  
618 **192**, 117–141 (2010).
- 619 27. Stott, M. B. *et al.* Isolation of novel bacteria, including a candidate division, from geothermal  
620 soils in New Zealand. *Environ. Microbiol.* **10**, 2030–2041 (2008).
- 621 28. Dunfield, P. F. *et al.* Methane oxidation by an extremely acidophilic bacterium of the phylum  
622 Verrucomicrobia. *Nature* **450**, 879–882 (2007).
- 623 29. Crowe, M. A. *et al.* *Pyrinomonas methylaliphatogenes* gen. nov. sp. nov., a novel group 4  
624 thermophilic Acidobacteria from geothermal soils. *Int. J. Syst. Evol. Microbiol.* **64**, 220–227  
625 (2014).
- 626 30. Anders, H. *et al.* *Limisphaera ngatamarikiensis* gen. nov., sp. nov., a thermophilic, pink-  
627 pigmented coccus isolated from subaqueous mud of a geothermal hot spring. *Int. J. Syst. Evol.*  
628 *Microbiol.* **65**, 1114–1121 (2015).
- 629 31. Hetzer, A., McDonald, I. R. & Morgan, H. W. *Venenivibrio stagnispumantis* gen. nov., sp. nov.,  
630 a thermophilic hydrogen-oxidizing bacterium isolated from Champagne Pool, Waiotapu, New  
631 Zealand. *Int. J. Syst. Evol. Microbiol.* **58**, 398–403 (2008).
- 632 32. Childs, A. M., Mountain, B. W., O’Toole, R. & Stott, M. B. Relating Microbial Community and  
633 Physicochemical Parameters of a Hot Spring: Champagne Pool, Wai-o-tapu, New Zealand.  
634 *Geomicrobiol. J.* **25**, 441–453 (2008).
- 635 33. Delgado-Baquerizo, M. *et al.* It is elemental: soil nutrient stoichiometry drives bacterial  
636 diversity. *Environ. Microbiol.* **19**, 1176–1188 (2017).
- 637 34. Tecon, R. & Or, D. Biophysical processes supporting the diversity of microbial life in soil.  
638 *FEMS Microbiol. Rev.* **41**, 599–623 (2017).
- 639 35. Eilers, K. G., Debenport, S., Anderson, S. & Fierer, N. Digging deeper to find unique microbial  
640 communities: The strong effect of depth on the structure of bacterial and archaeal communities  
641 in soil. *Soil Biol. Biochem.* **50**, 58–65 (2012).
- 642 36. Inskeep, W. P., Jay, Z. J., Tringe, S. G., Herrgård, M. J. & Rusch, D. B. The YNP Metagenome  
643 Project: Environmental Parameters Responsible for Microbial Distribution in the Yellowstone  
644 Geothermal Ecosystem. *Front. Microbiol.* **4**, 67 (2013).
- 645 37. Ramirez, K. S. *et al.* Biogeographic patterns in below-ground diversity in New York City’s  
646 Central Park are similar to those observed globally. *Proc. R. Soc. B Biol. Sci.* **281**, 20141988  
647 (2014).

- 648 38. Yashiro, E. *et al.* Local Environmental Factors Drive Divergent Grassland Soil Bacterial  
649 Communities in the Western Swiss Alps. *Appl. Environ. Microbiol.* **82**, 6303–6316 (2016).
- 650 39. Logue, J. B. *et al.* Freshwater bacterioplankton richness in oligotrophic lakes depends on  
651 nutrient availability rather than on species–area relationships. *ISME J.* **6**, 1127–1136 (2012).
- 652 40. Bååth, E. & Kritzberg, E. pH Tolerance in Freshwater Bacterioplankton : Trait Variation of the  
653 Community as Measured by Leucine Incorporation. *Appl. Environ. Microbiol.* **81**, 7411–7419  
654 (2015).
- 655 41. McCarthy, S. *et al.* Expanding the Limits of Thermoacidophily by Adaptive Evolution. *Appl.*  
656 *Environ. Microbiol.* **82**, 857–867 (2016).
- 657 42. Colman, D. R. *et al.* Geobiological feedbacks and the evolution of thermoacidophiles. *ISME J.*  
658 **Advance on**, 1–12 (2017).
- 659 43. Stetter, K. O. Extremophiles and their adaptation to hot environments. *FEBS Lett.* **452**, 22–25  
660 (1999).
- 661 44. Lozupone, C. a & Knight, R. Global patterns in bacterial diversity. *Proc. Natl. Acad. Sci. U. S.*  
662 *A.* **104**, 11436–11440 (2007).
- 663 45. Thompson, L. R. *et al.* A communal catalogue reveals Earth’s multiscale microbial diversity.  
664 *Nature* **551**, 457–463 (2017).
- 665 46. Walters, W. *et al.* Improved Bacterial 16S rRNA Gene (V4 and V4-5) and Fungal Internal  
666 Transcribed Spacer Marker Gene Primers for Microbial Community Surveys. *mSystems* **1**,  
667 e0009-15 (2015).
- 668 47. Sessitsch, A. *et al.* Microbial Population Structures in Soil Particle Size Fractions of a Long-  
669 Term Fertilizer Field Experiment. *Appl. Environ. Microbiol.* **67**, 4215–4224 (2001).
- 670 48. Reysenbach, A.-L. & Shock, E. L. Merging Genomes with Geochemistry in Hydrothermal  
671 Ecosystems. *Science* **296**, 1077–1082 (2002).
- 672 49. Jiang, X. & Takacs-Vesbach, C. D. Microbial community analysis of pH 4 thermal springs in  
673 Yellowstone National Park. *Extremophiles* **21**, 135–152 (2017).
- 674 50. Gupta, R. S. The Phylum Aquificae. in *The Prokaryotes* (eds. Rosenberg, E., DeLong, E. F.,  
675 Lory, S., Stackebrandt, E. & Thompson, F.) 417–445 (Springer Reference, 2014).
- 676 51. Greening, C. *et al.* Persistence of the dominant soil phylum *Acidobacteria* by trace gas  
677 scavenging. *Proc. Natl. Acad. Sci.* **112**, 10497–10502 (2015).
- 678 52. Ji, M. *et al.* Atmospheric trace gases support primary production in Antarctic desert  
679 ecosystems. *Nature* **552**, 400–403 (2017).
- 680 53. Nakagawa, S., Takai, K., Inagaki, F., Horikoshi, K. & Sako, Y. Nitratiruptor tergaricus gen. nov.,  
681 sp. nov. and Nitratifactor salsuginis gen. nov., sp. nov., nitrate-reducing chemolithoautotrophs  
682 of the E-Proteobacteria isolated from a deep-sea hydrothermal system in the Mid-Okinawa  
683 Trough. *Int. J. Syst. Evol. Microbiol.* **55**, 925–933 (2005).
- 684 54. Schink, B. & Friedrich, M. Bacterial metabolism: Phosphite oxidation by sulphate reduction.  
685 *Nature* **406**, 37 (2000).
- 686 55. White, A. K. & Metcalf, W. W. Microbial metabolism of reduced phosphorus compounds. *Annu*  
687 *Rev Microbiol* **61**, 379–400 (2007).

- 688 56. Yu, T. T. *et al.* *Thermus amyloliquefaciens* sp. nov., isolated from a hot spring sediment  
689 sample. *Int. J. Syst. Evol. Microbiol.* **65**, 2491–2495 (2015).
- 690 57. Shima, S. & Suzuki, K.-I. *Hydrogenobacter acidophilus* sp. nov., a Thermoacidophilic, Aerobic,  
691 Hydrogen-Oxidizing Bacterium Requiring Elemental Sulfur for Growth. *Int. J. Syst. Evol.*  
692 *Microbiol.* **43**, 703–708 (1993).
- 693 58. Huber, R. *et al.* *Aquifex pyrophilus* gen. nov. sp. nov., Represents a Novel Group of Marine  
694 Hyperthermophilic Hydrogen-Oxidizing Bacteria. *Syst. Appl. Microbiol.* **15**, 340–351 (1992).
- 695 59. Zhang, K., Song, L. & Dong, X. *Proteiniclasticum ruminis* gen. nov., sp. nov., a strictly  
696 anaerobic proteolytic bacterium isolated from yak rumen. *Int. J. Syst. Evol. Microbiol.* **60**,  
697 2221–2225 (2010).
- 698 60. Fadhlaoui, K. *et al.* *Fusibacter fontis* sp. Nov., a sulfur-reducing, anaerobic bacterium isolated  
699 from a mesothermic Tunisian spring. *Int. J. Syst. Evol. Microbiol.* **65**, 3501–3506 (2015).
- 700 61. Martiny, J. B. H., Eisen, J. A., Penn, K., Allison, S. D. & Horner-Devine, M. C. Drivers of  
701 bacterial  $\beta$ -diversity depend on spatial scale. *Proc. Natl. Acad. Sci. U. S. A.* **108**, 7850–7854  
702 (2011).
- 703 62. Louca, S., Parfrey, L. W. & Doebeli, M. Decoupling function and taxonomy in the global ocean  
704 microbiome. *Science* **353**, 1272–1277 (2016).
- 705 63. Campbell, K. M. *et al.* *Sulfolobus islandicus* meta-populations in Yellowstone National Park hot  
706 springs. *Environ. Microbiol.* **19**, 2334–2347 (2017).
- 707 64. Cadillo-Quiroz, H. *et al.* Patterns of gene flow define species of thermophilic Archaea. *PLoS*  
708 *Biol.* **10**, e1001265 (2012).
- 709 65. Hjort, K. & Bernander, R. Changes in Cell Size and DNA Content in *Sulfolobus* Cultures during  
710 Dilution and Temperature Shift Experiments Changes in Cell Size and DNA Content in  
711 *Sulfolobus* Cultures during Dilution and Temperature Shift Experiments. *J. Bacteriol.* **181**,  
712 5669–5675 (1999).
- 713 66. Campbell, K. M. *et al.* *Sulfolobus islandicus* meta-populations in Yellowstone National Park hot  
714 springs. *Environ. Microbiol.* **19**, 2334–2347 (2017).
- 715 67. Takacs-Vesbach, C., Mitchell, K., Jackson-Weaver, O. & Reysenbach, A.-L. Volcanic calderas  
716 delineate biogeographic provinces among Yellowstone thermophiles. *Environ. Microbiol.* **10**,  
717 1681–9 (2008).
- 718 68. Elser, J. J. *et al.* Community structure and biogeochemical impacts of microbial life on floating  
719 pumice. *Appl. Environ. Microbiol.* **81**, 1542–9 (2015).
- 720 69. Archer, S. D. J., McDonald, I. R., Herbold, C. W. & Cary, S. C. Characterisation of  
721 bacterioplankton communities in the meltwater ponds of Bratina Island, Victoria Land,  
722 Antarctica. *FEMS Microbiol. Ecol.* **89**, 451–464 (2014).
- 723 70. Gilbert, J. A., Jansson, J. K. & Knight, R. The Earth Microbiome project: successes and  
724 aspirations. *BMC Biol.* **12**, 69 (2014).
- 725 71. Edgar, R. C. UPARSE: highly accurate OTU sequences from microbial amplicon reads. *Nat.*  
726 *Methods* **10**, 996–998 (2013).
- 727 72. Caporaso, J. G. *et al.* QIIME allows analysis of high-throughput community sequencing data.

- 728 *Nat. Methods* **7**, 335–336 (2010).
- 729 73. Schloss, P. D. *et al.* Introducing mothur: Open-source, platform-independent, community-  
730 supported software for describing and comparing microbial communities. *Appl. Environ.*  
731 *Microbiol.* **75**, 7537–7541 (2009).
- 732 74. Wang, Q., Garrity, G. M., Tiedje, J. M. & Cole, J. R. Naive Bayesian Classifier for Rapid  
733 Assignment of rRNA Sequences into the New Bacterial Taxonomy. *Appl. Environ. Microbiol.*  
734 **73**, 5261–5267 (2007).
- 735 75. Quast, C. *et al.* The SILVA ribosomal RNA gene database project: Improved data processing  
736 and web-based tools. *Nucleic Acids Res.* **41**, 590–596 (2013).
- 737 76. R Development Core Team. R: A Language and Environment for Statistical Computing.  
738 (2017).
- 739 77. McMurdie, P. J. & Holmes, S. phyloseq: An R Package for Reproducible Interactive Analysis  
740 and Graphics of Microbiome Census Data. *PLoS One* **8**, e61217 (2013).
- 741 78. Oksanen, J. *et al.* vegan: Community Ecology Package. R package version 2.4-3. (2017).
- 742 79. Wickham, H. *ggplot2: Elegant Graphics for Data Analysis*. (Springer-Verlag New York, 2009).
- 743 80. Dormann, C. F. *et al.* Collinearity: A review of methods to deal with it and a simulation study  
744 evaluating their performance. *Ecography (Cop.)*. **36**, 27–46 (2013).
- 745 81. Aho, K., Derryberry, D. & Peterson, T. Model selection for ecologists: the worldview of AIC and  
746 BIC. *Ecology* **95**, 631–636 (2014).
- 747 82. Hamilton, N. ggtern: An Extension to 'ggplot2', for the Creation of Ternary Diagrams. R  
748 package version 2.1.5. (2016).
- 749 83. Robinson, M. D., McCarthy, D. J. & Smyth, G. K. edgeR: A Bioconductor package for  
750 differential expression analysis of digital gene expression data. *Bioinformatics* **26**, 139–140  
751 (2010).
- 752 84. Yu, G., Smith, D. K., Zhu, H., Guan, Y. & Lam, T. T. Y. Ggtree: an R Package for Visualization  
753 and Annotation of Phylogenetic Trees With Their Covariates and Other Associated Data.  
754 *Methods Ecol. Evol.* **8**, 28–36 (2017).
- 755 85. Caporaso, J. G. *et al.* PyNAST: A flexible tool for aligning sequences to a template alignment.  
756 *Bioinformatics* **26**, 266–267 (2010).
- 757 86. Price, M. N., Dehal, P. S. & Arkin, A. P. Fasttree: Computing large minimum evolution trees  
758 with profiles instead of a distance matrix. *Mol. Biol. Evol.* **26**, 1641–1650 (2009).
- 759
- 760



761 **Table 1 | Average relative abundances and prevalence of phyla and genera.**  
 762 Only taxa above a 1 % average compositional threshold are shown. Maximum  
 763 abundance of each taxon within individual features and standard deviation are noted.  
 764 Where taxonomy assignment failed to classify to genus level, the closest assigned  
 765 taxonomy is shown (f = family, o = order, p = phylum).

766  
 767

| Phylum                | Genus                         | Abundance | SD    | Max   | Prevalence |
|-----------------------|-------------------------------|-----------|-------|-------|------------|
| Aquificae             | <i>Venenivibrio</i>           | 0.112     | 0.231 | 0.968 | 0.742      |
| Proteobacteria        | <i>Acidithiobacillus</i>      | 0.111     | 0.242 | 0.994 | 0.629      |
| Aquificae             | <i>Hydrogenobaculum</i>       | 0.100     | 0.235 | 0.999 | 0.608      |
| Aquificae             | <i>Aquifex</i>                | 0.086     | 0.212 | 0.971 | 0.497      |
| Deinococcus-Thermus   | <i>Thermus</i>                | 0.025     | 0.071 | 0.732 | 0.552      |
| Proteobacteria        | <i>Thiomonas</i>              | 0.024     | 0.101 | 0.941 | 0.396      |
| Proteobacteria        | <i>Desulfurella</i>           | 0.022     | 0.067 | 0.758 | 0.497      |
| Crenarchaeota         | <i>Sulfolobaceae</i> (f)      | 0.020     | 0.091 | 0.951 | 0.416      |
| Euryarchaeota         | <i>Thermoplasmatales</i> (o)  | 0.019     | 0.059 | 0.495 | 0.539      |
| Proteobacteria        | <i>Thiovirga</i>              | 0.015     | 0.077 | 0.816 | 0.374      |
| Proteobacteria        | <i>Hydrogenophilaceae</i> (f) | 0.015     | 0.072 | 0.704 | 0.406      |
| Thermodesulfobacteria | <i>Caldimicrobium</i>         | 0.015     | 0.052 | 0.651 | 0.519      |
| Proteobacteria        | <i>Hydrogenophilus</i>        | 0.013     | 0.045 | 0.432 | 0.484      |
| Thermotogae           | <i>Mesoaciditoga</i>          | 0.011     | 0.033 | 0.286 | 0.410      |
| Parcubacteria         | <i>Parcubacteria</i> (p)      | 0.010     | 0.024 | 0.193 | 0.608      |

768  
 769  
 770

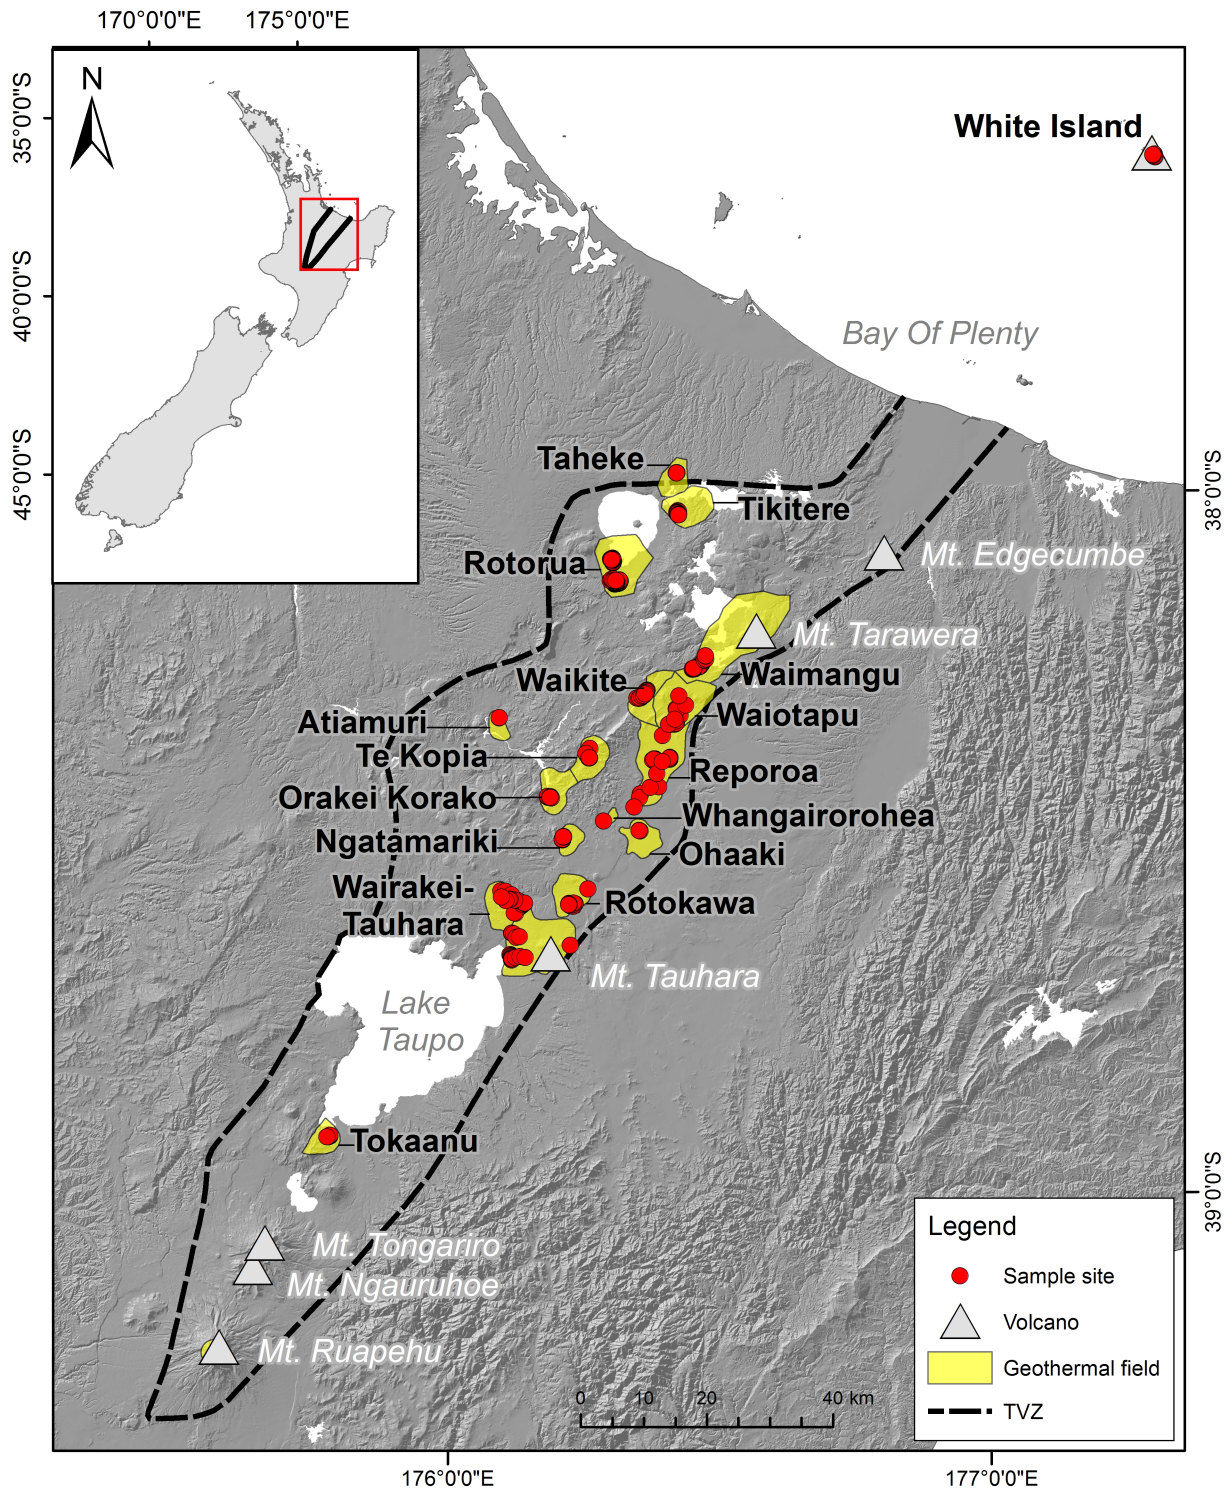

**Fig. 1 | Map of the Taupō Volcanic Zone (TVZ), New Zealand.** Geothermal fields are highlighted in yellow, with springs sampled for the 1,000 Springs Project in red ( $n = 1,019$ ).

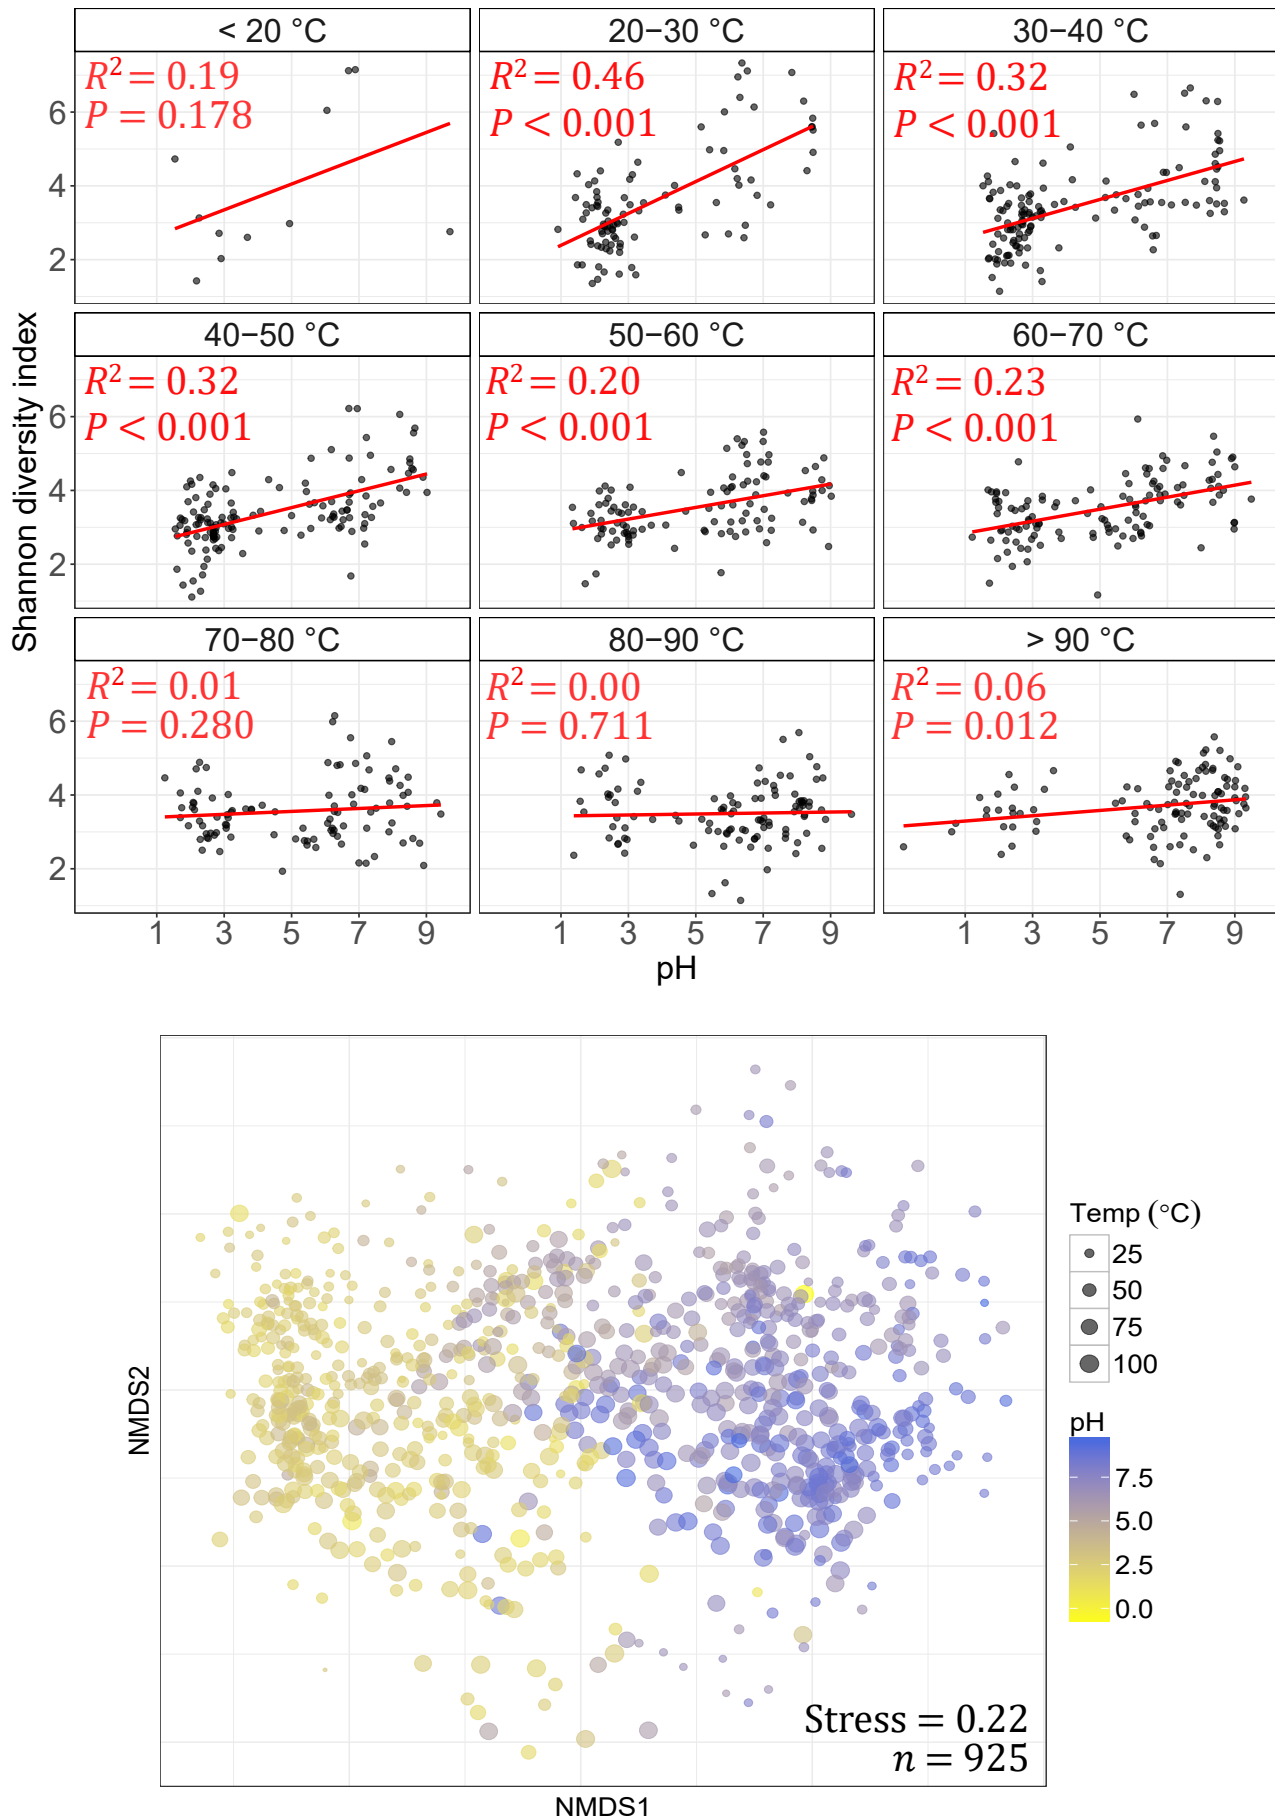

**Fig. 2 | Alpha and beta diversity against pH and temperature.** (Top) pH against alpha diversity via Shannon index of all individual springs ( $n=925$ ) in 10 °C increments, with linear regression applied to each increment. (Bottom) Non-metric multidimensional scaling (NMDS) plot of beta diversity (via Bray-Curtis dissimilarities) between all microbial community structures.

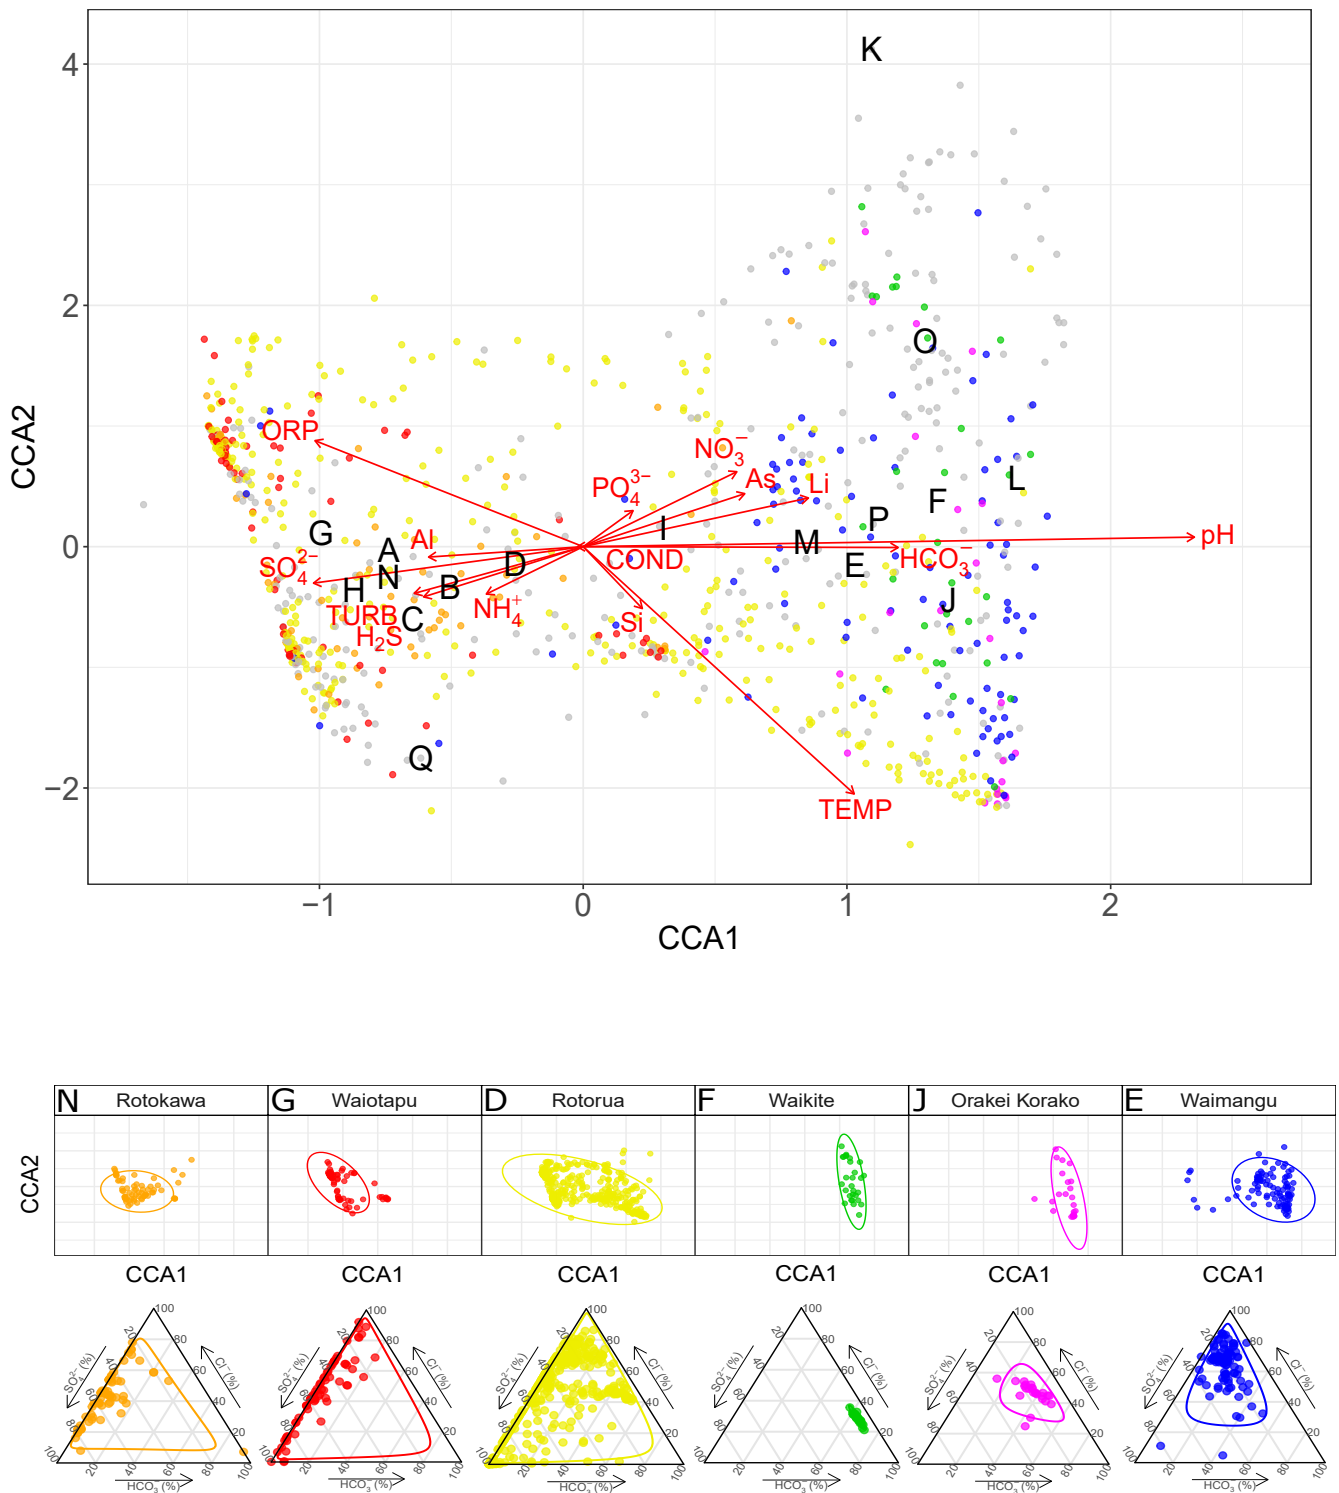

**Fig. 3 | Constrained correspondence analysis (CCA) of beta diversity with significant physicochemistry.** (Top) A scatter plot of spring community dissimilarities ( $n=923$ ), with letters corresponding to centroids from the model for geothermal fields (A-Q; White Island, Taheke, Tikitere, Rotorua, Waimangu, Waikite, Waiotapu, Te Kopia, Reporoa, Orakei Korako, Whangairorohea, Ohaaki, Ngatamariki, Rotokawa, Wairakei-Tauhara, Tokaanu, Misc). Coloured communities are from fields represented in the subpanel. Constraining variables are plotted as arrows (COND: conductivity, TURB: turbidity), with length and direction indicating scale and area of influence each variable had on the model. (Bottom) A subset of the full CCA model, with select geothermal fields shown in colour (including 95 % confidence intervals) and their respective geochemical signature as a ratio of chloride (Cl<sup>-</sup>), sulfate (SO<sub>4</sub><sup>2-</sup>) and bicarbonate (HCO<sub>3</sub><sup>-</sup>).



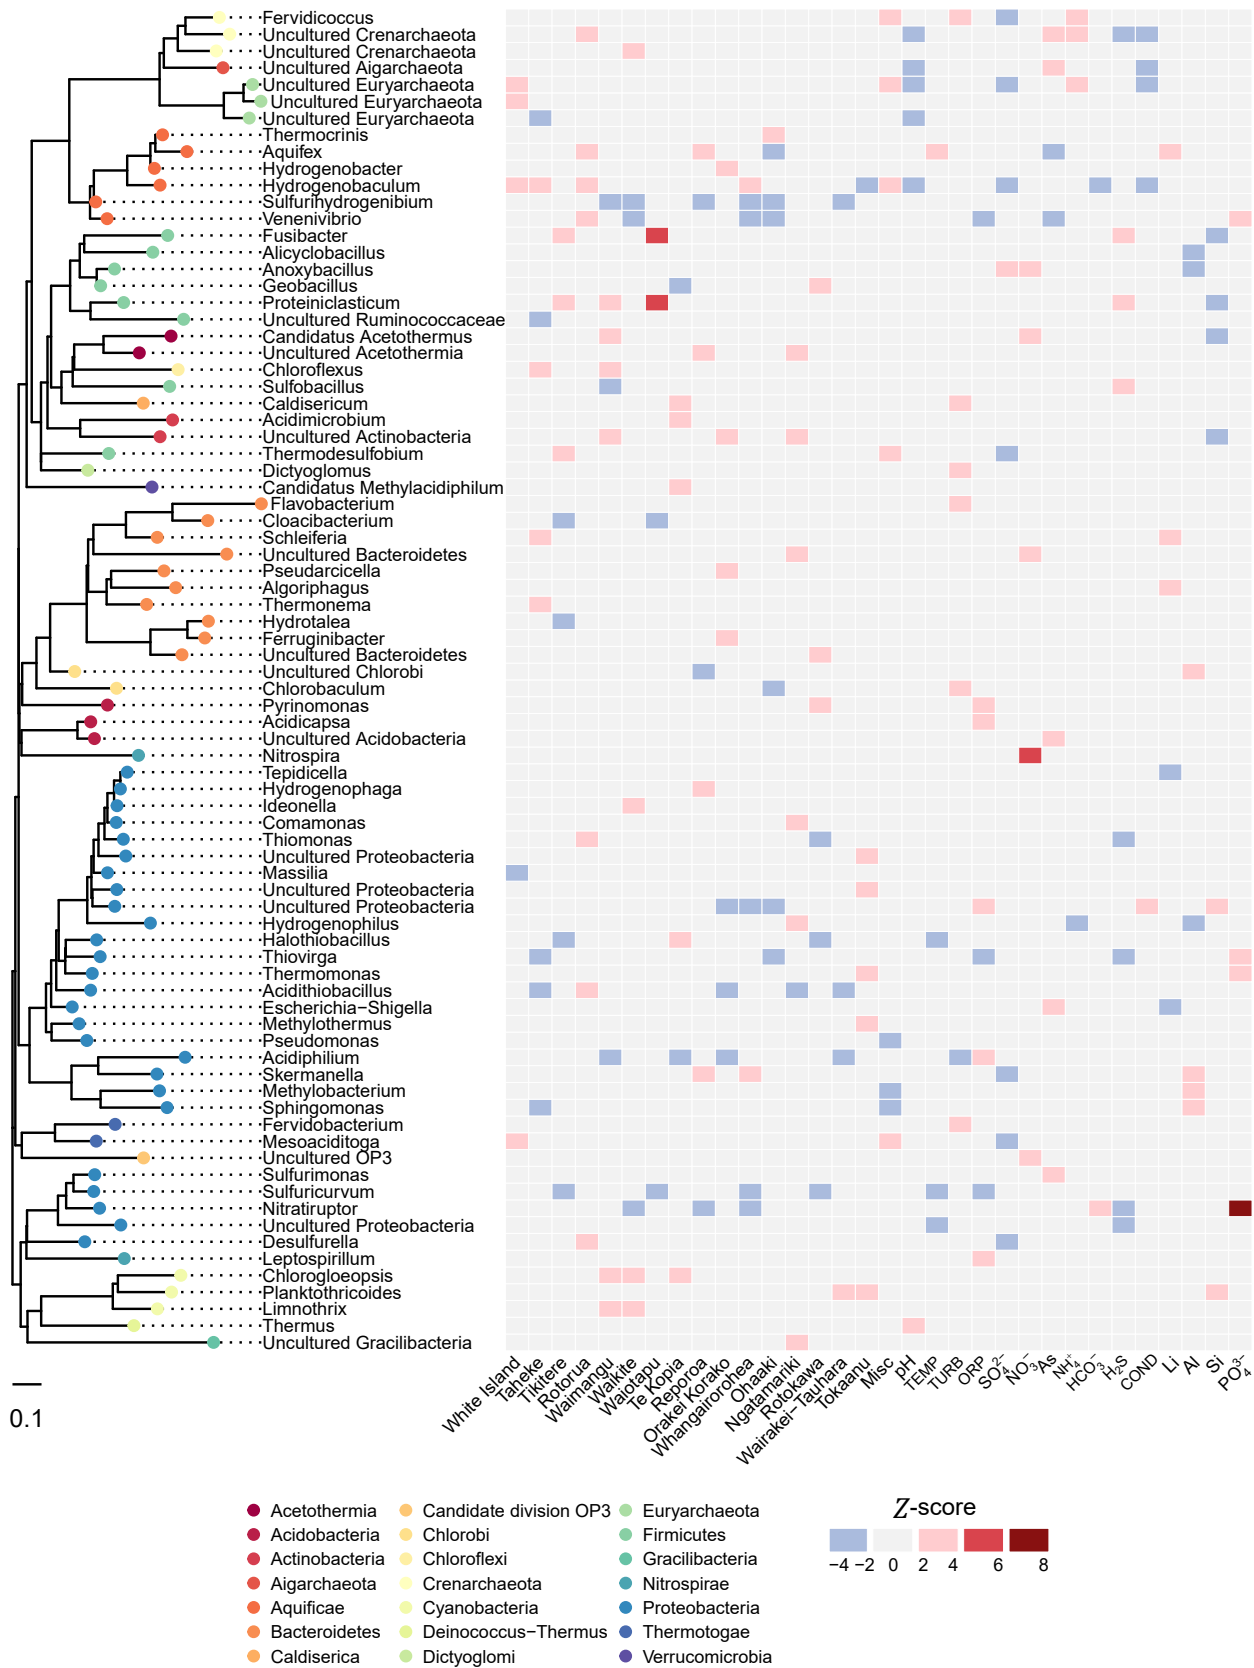

**Fig. 4 | Taxonomic association with location and physicochemistry.** The heat map displays positive (red) and negative (blue) association of genus-level taxa (> 0.1 % average relative abundance) with each geothermal field and significant environmental variables, based on Z-scores of abundance log ratios. Each taxon is colour-coded to corresponding phylum on the approximately maximum-likelihood phylogenetic tree.

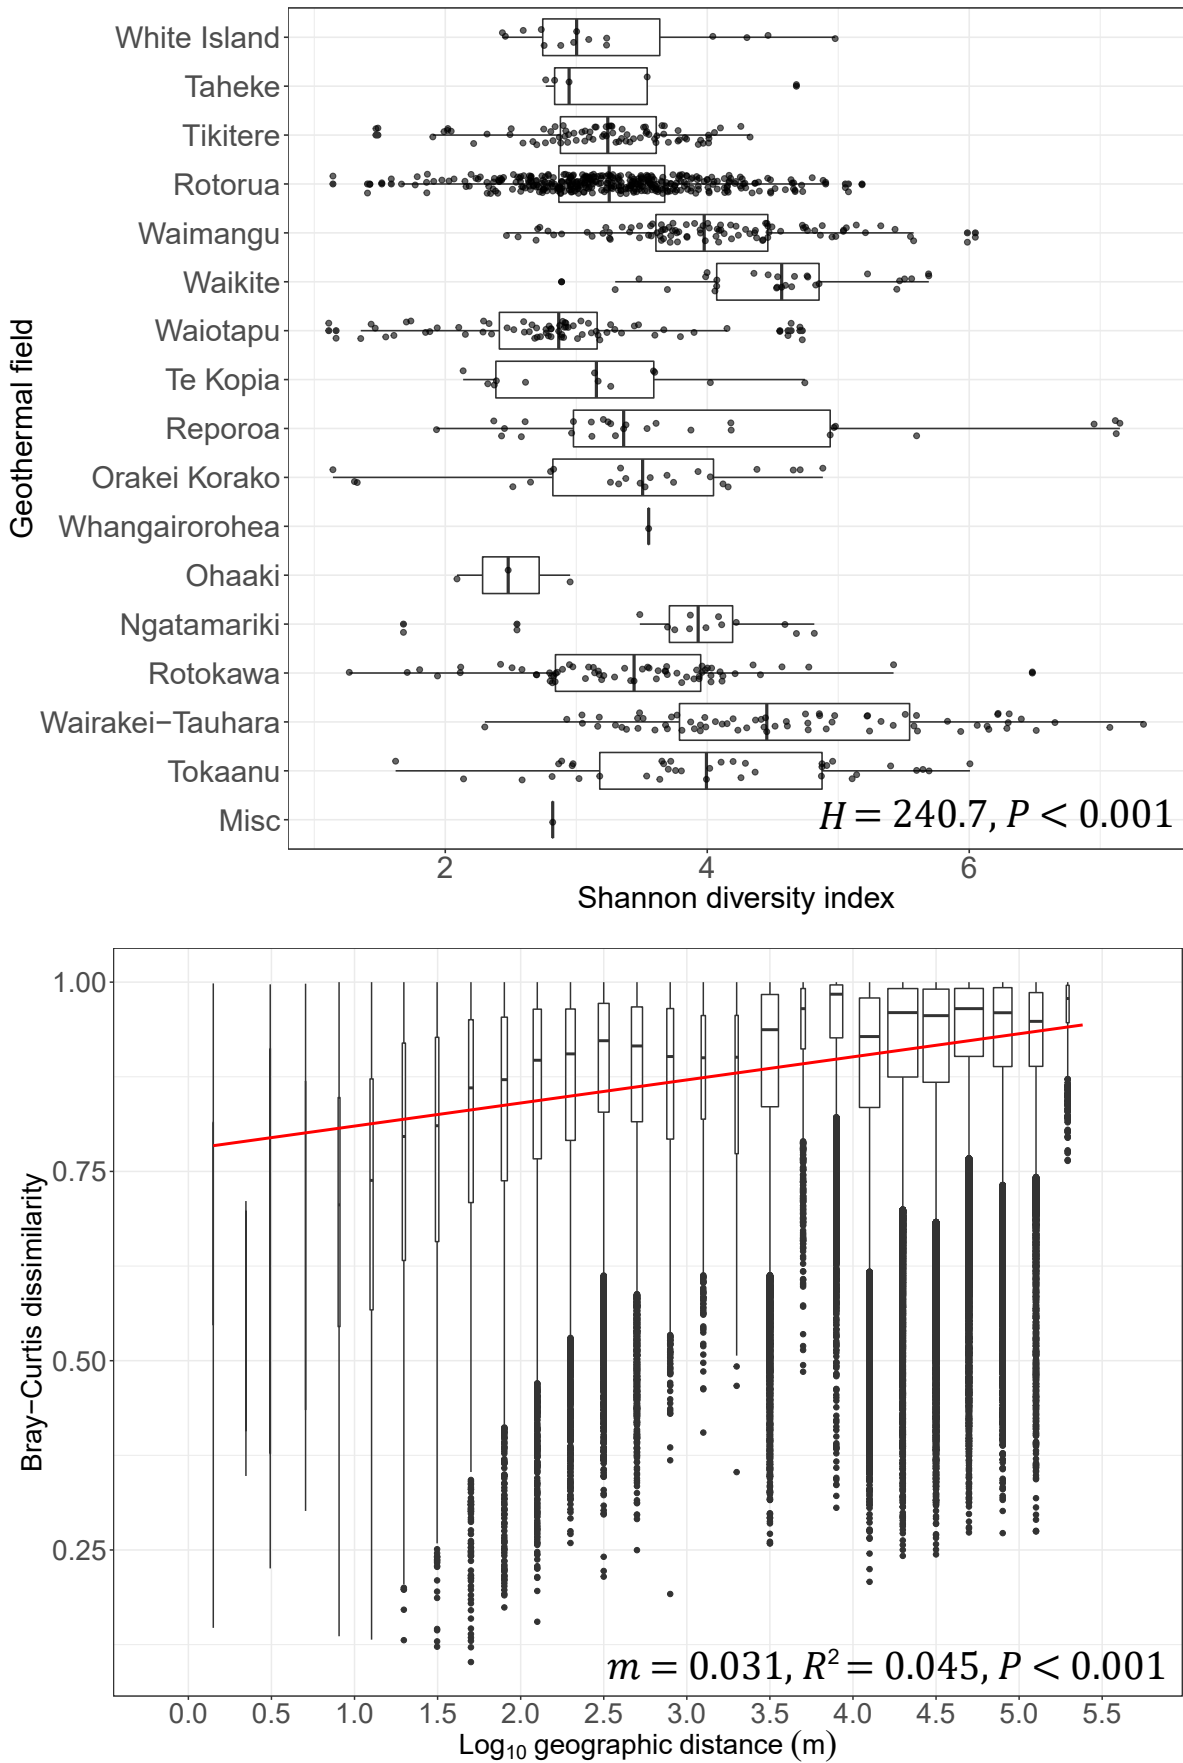

**Fig. 5 | Alpha and beta diversity against geographic distance.** (Top) Alpha diversity scales (via Shannon index) across individual springs, separated by geothermal fields. Fields are ordered from north to south ( $H$ : Kruskal-Wallis test). (Bottom) A distance-decay pattern of beta diversity (via Bray-Curtis dissimilarities of 925 springs) against pairwise geographic distance in metres, with linear regression applied. Geographic distance is split into bins to aid visualisation of the spread.
